# Supplementary material for: MAPK activation and HRAS mutation identified in pituitary spindle cell oncocytoma
Source: PubMed Central journal article supplement (PMC5095058; doi:10.18632/oncotarget.9244), 2016-05-09
Supplement: oncotarget-07-37054-s001.pdf [file oncotarget-07-37054-s001.pdf]

SUPPLEMENTARY FIGURE

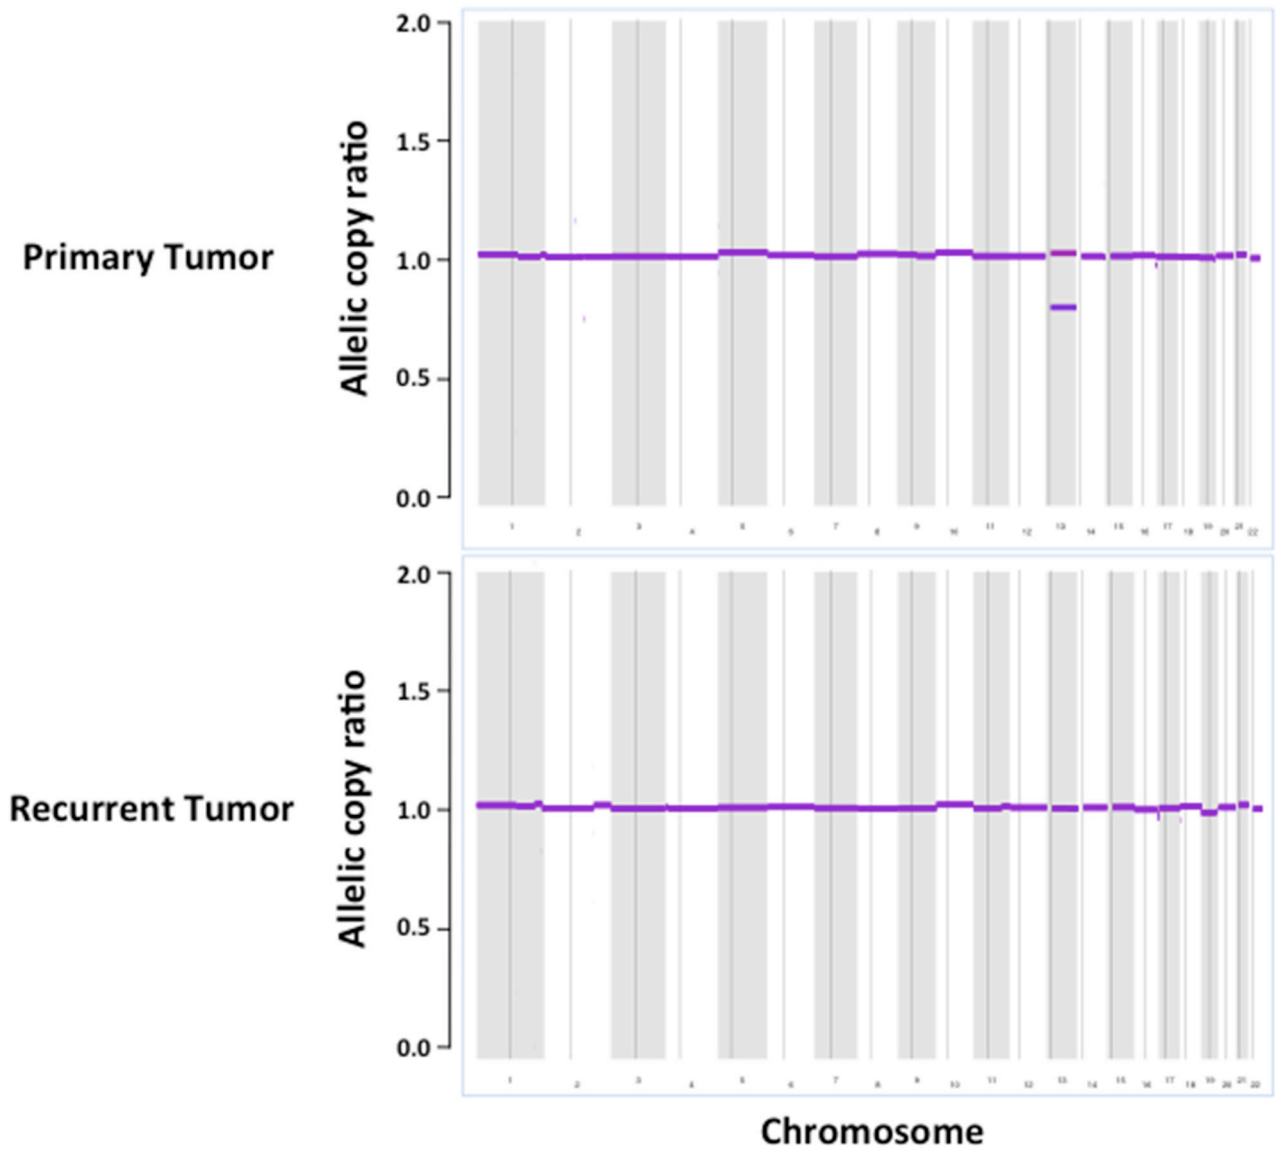

**Supplementary Figure S1: Chromosomal Copy Number Profile of a Recurrent Spindle Cell Oncocytoma.** Allelic copy number ratios are shown by chromosome for the primary tumor (case 3A) and the recurrent/residual tumor (case 3B).
